# Supplementary material for: Connecting two C60stoppers to molecular wires: ultrafast intramolecular deactivation reactions
Source: Royal Society of Chemistry journal article supplement (doi:10.1039/b412110d), 2004-11-26
Supplement: b412110d.pdf [file b412110d.pdf]

SUPPORTING INFORMATION

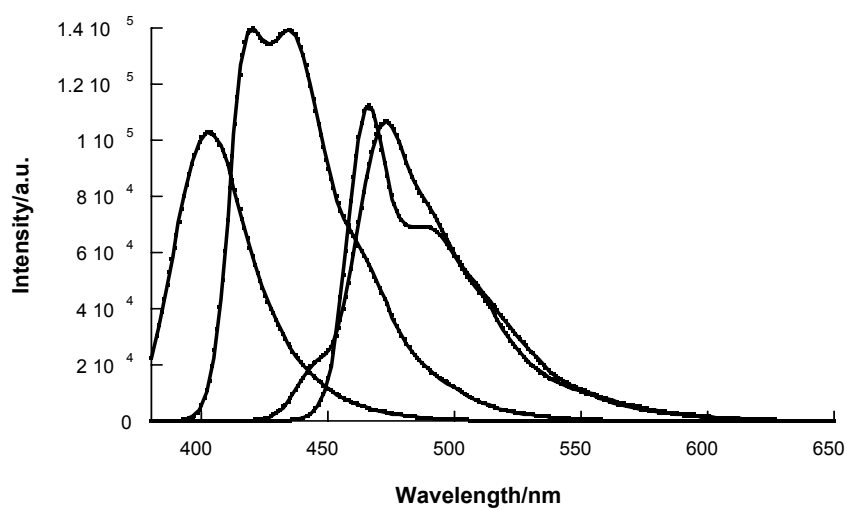

Figure S1: Fluorescence spectra of 10a, 9,10 diphenylanthracene, 10b, and 10c – in order of increasing wavelength – in toluene with matching absorption at 360 nm excitation wavelength (i.e., OD<sub>360 nm</sub> = 0.2). Fluorescence quantum yield of 9,10 diphenylanthracene is 1.
